# Supplementary material for: Carbon-based ionic liquid gels: alternative adsorbents for pharmaceutically active compounds in wastewater
Source: Royal Society of Chemistry journal article supplement (doi:10.1039/d0en01042a), 2020-12-10
Supplement: d0en01042a1.pdf [file d0en01042a1.pdf]

## Electronic supplementary information

### Carbon Based Ionic Liquid Gels: Alternative adsorbents for Pharmaceutically Active Compounds in Wastewater

Carla Rizzo,<sup>a</sup> Salvatore Marullo,<sup>a</sup> Francesca D'Anna<sup>a\*</sup>

<sup>a</sup> Dipartimento di Scienze e Tecnologie Biologiche, Chimiche e Farmaceutiche, Sezione di Chimica,  
Viale delle  
Scienze, Università degli Studi di Palermo, Palermo 90128, Italy

Corresponding author email: francesca.danna@unipa.it

|                                                                                                                                                               |         |
|---------------------------------------------------------------------------------------------------------------------------------------------------------------|---------|
| <b>Figure S1.</b> Strain and frequency sweep.                                                                                                                 | pag. S2 |
| <b>Figure S2.</b> SEM image of <b>graphite/PF<sub>6</sub></b> xerogel.                                                                                        | pag. S2 |
| <b>Figure S3.</b> Pictures to check the release of <b>graphite/PF<sub>6</sub></b> gel components.                                                             | pag. S3 |
| <b>Figure S4.</b> Turbidity measurements to check release of graphite from gel.                                                                               | pag. S3 |
| <b>Figure S5.</b> <sup>1</sup> H NMR spectra in D <sub>2</sub> O to check the release of <b>graphite/PF<sub>6</sub></b> gel components.                       | pag. S4 |
| <b>Figure S6.</b> <sup>1</sup> H NMR spectra in D <sub>2</sub> O to check the release of <b>graphite/NTf<sub>2</sub></b> gel components.                      | pag. S4 |
| <b>Figure S7.</b> UV spectra of PhAC solutions as function of contact time with gel.                                                                          | pag. S5 |
| <b>Figure S8.</b> <sup>1</sup> H NMR spectra to check the release of <b>graphite/PF<sub>6</sub></b> gel components in desorption process using 2-Me-THF.      | pag. S6 |
| <b>Figure S9.</b> <sup>1</sup> H NMR spectra to check the release of <b>graphite/PF<sub>6</sub></b> gel components in desorption process using ethyl-lactate. | pag. S6 |
| <b>Figure S10.</b> Pictures to check stability of <b>graphite/PF<sub>6</sub></b> gel after desorption process.                                                | pag. S7 |
| <b>Figure S11.</b> UV spectra of PhAC mixtures and single PhACs before and after adsorption on gel.                                                           | pag. S7 |
| <b>Table S1.</b> RE of <b>graphite/PF<sub>6</sub></b> for recycling cycles.                                                                                   | pag. S7 |
| <b>Table S2.</b> Desorption of CBZ from <b>graphite/PF<sub>6</sub></b> after 9 cycles of adsorption in different solvents.                                    | pag. S8 |
| <b>Table S3.</b> RE of <b>graphite/PF<sub>6</sub></b> as function of CBZ initial concentration.                                                               | pag. S8 |
| <b>Table S4.</b> RE of <b>graphite/PF<sub>6</sub></b> as function of stirring rate.                                                                           | pag. S8 |
| <b>Table S5.</b> RE of <b>graphite/PF<sub>6</sub></b> as function of volume of CBZ.                                                                           | pag. S8 |
| <b>Table S6.</b> RE of <b>graphite/PF<sub>6</sub></b> with mixtures of PhACs.                                                                                 | pag. S8 |

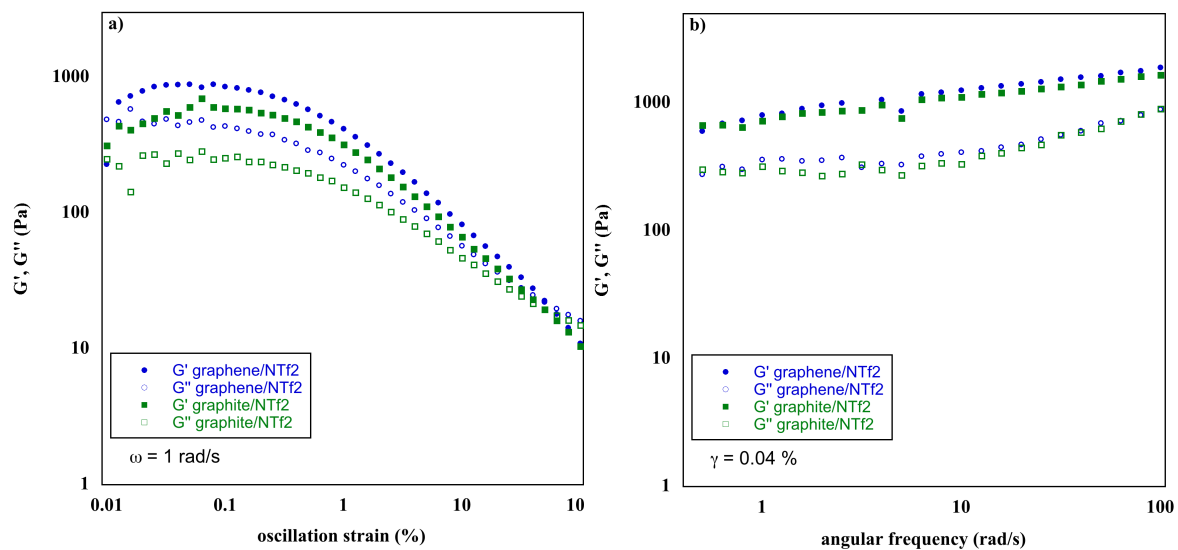

**Figure S1.** a) Strain and b) frequency sweep.

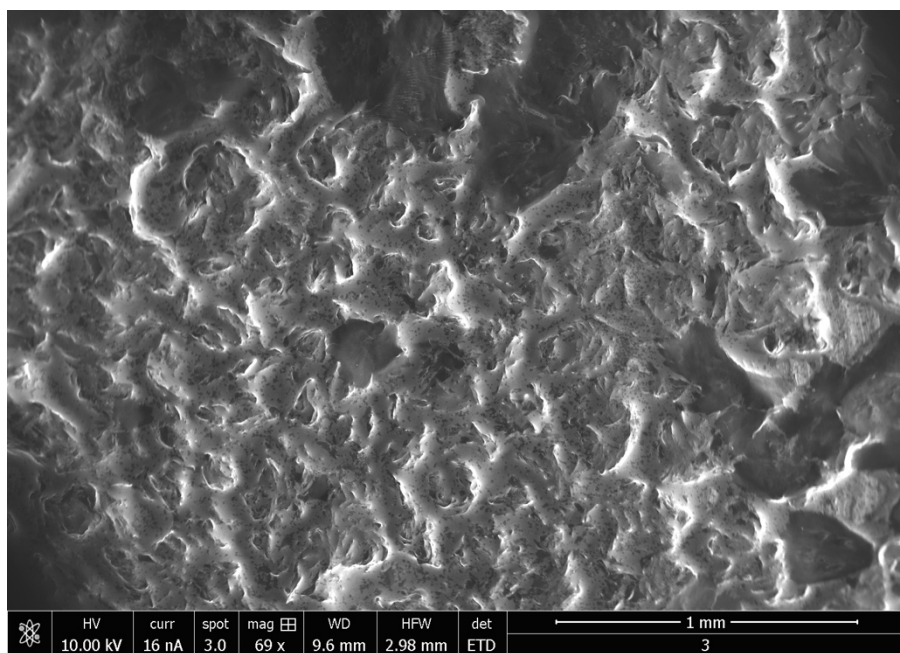

**Figure S2.** SEM image of graphite/PF<sub>6</sub> xerogel.

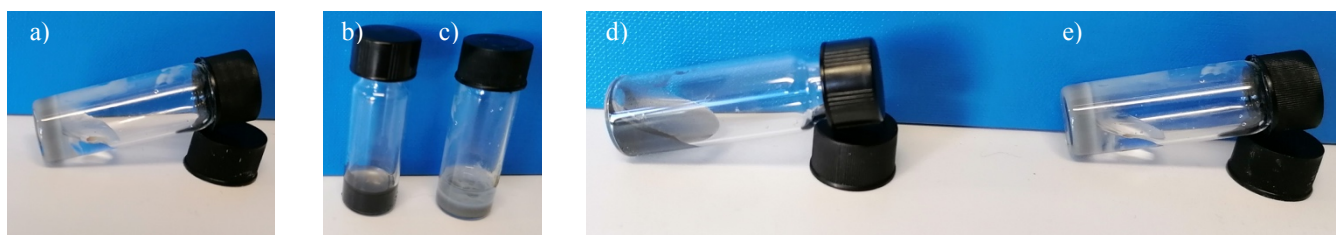

**Figure S3.** Pictures of **a)** water in contact with hybrid gels after adsorption, **b-d)** dispersion of graphite in water, **c-e)** water in contact with **graphite/PF<sub>6</sub>** gel after 5h.

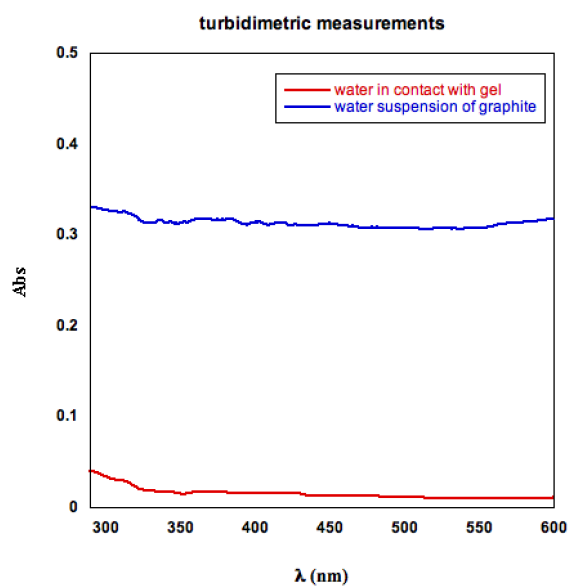

**Figure S4.** UV spectra of dispersion of graphite in water and water after 5h of contact with **graphite/PF<sub>6</sub>** gel.

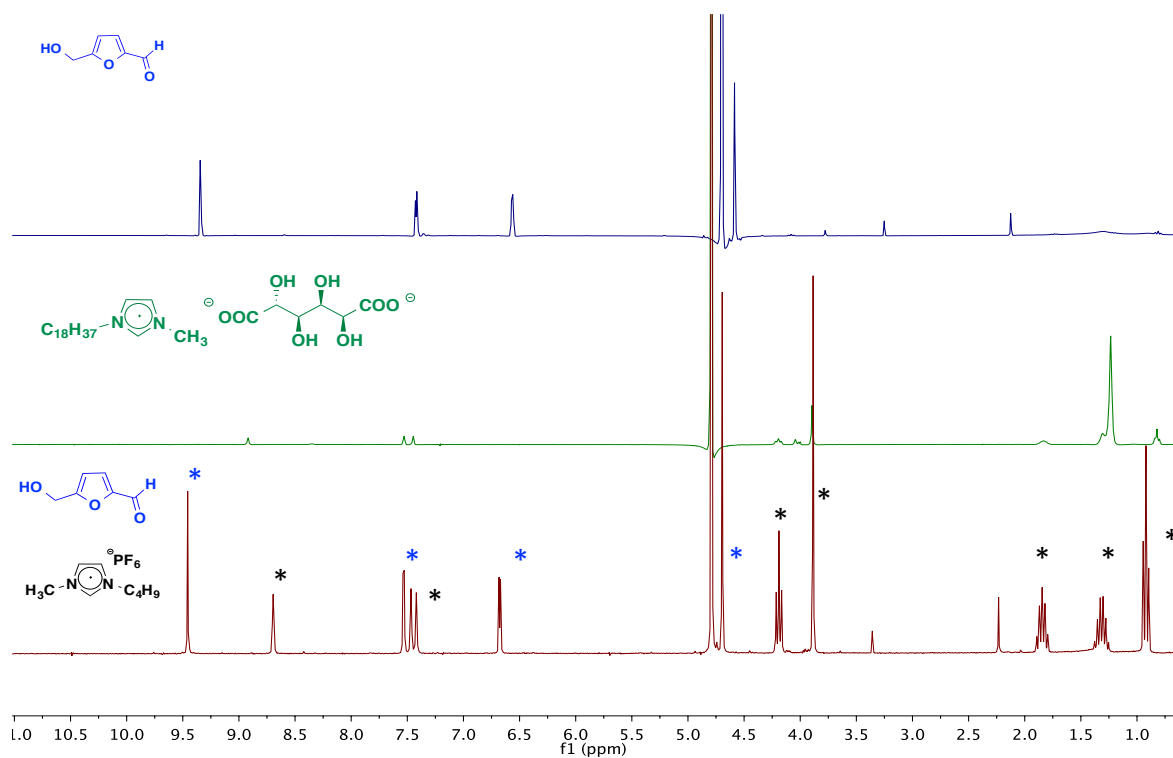

**Figure S5.**  $^1\text{H}$  NMR spectra of:  $\text{D}_2\text{O}$  after 5 h of contact with **graphite/PF<sub>6</sub>** with 5-HMF as internal standard (red), colored asterisks identify protons of the components in the mixture; gelator in  $\text{D}_2\text{O}$  (green); 5-HMF in  $\text{D}_2\text{O}$  (blue).

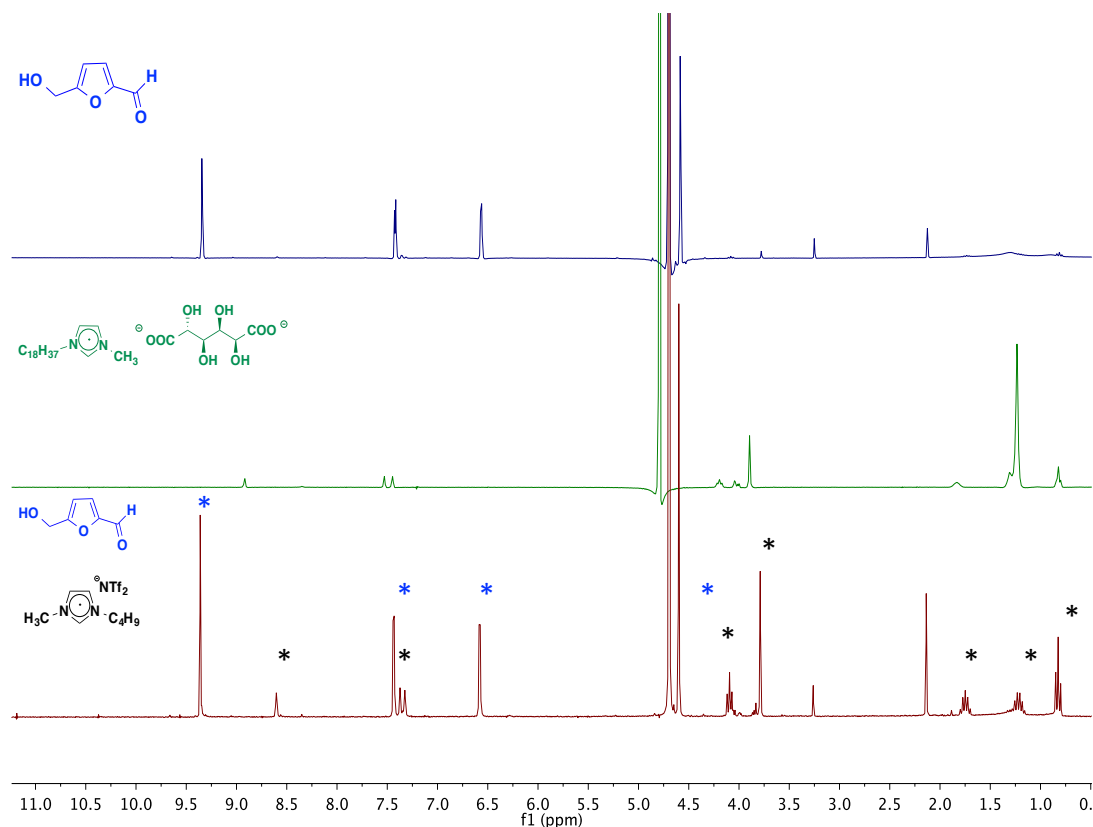

**Figure S6.**  $^1\text{H}$  NMR spectra of:  $\text{D}_2\text{O}$  after 5 h of contact with **graphite/NTf<sub>2</sub>** with 5-HMF as internal standard (red), colored asterisks identify protons of the components in the mixture; gelator in  $\text{D}_2\text{O}$  (green); 5-HMF in  $\text{D}_2\text{O}$  (blue).

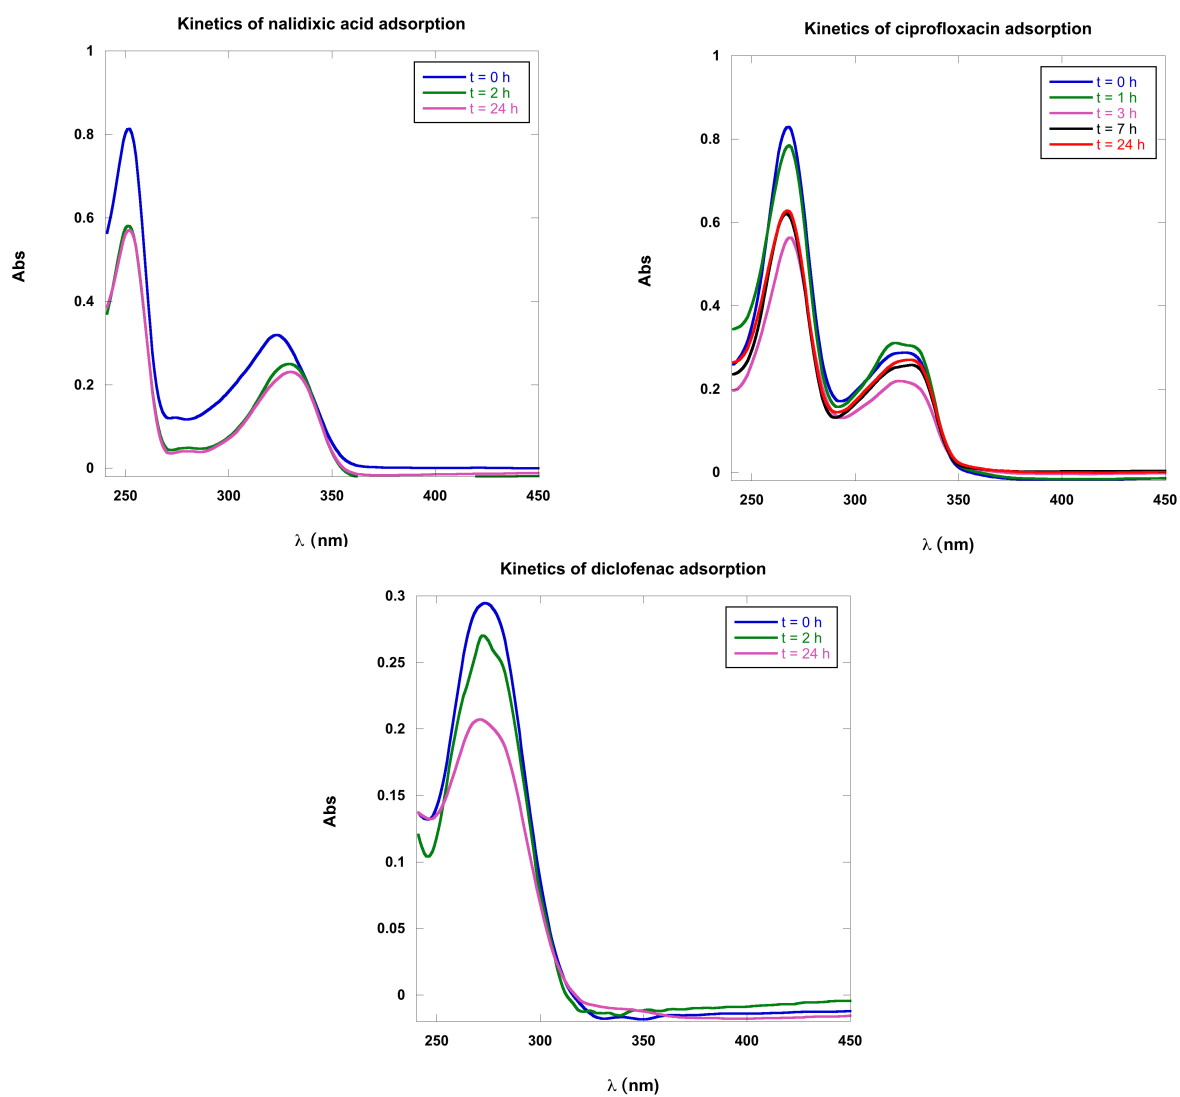

**Figure S7.** UV spectra of PhAC solutions as function of contact time with gel.

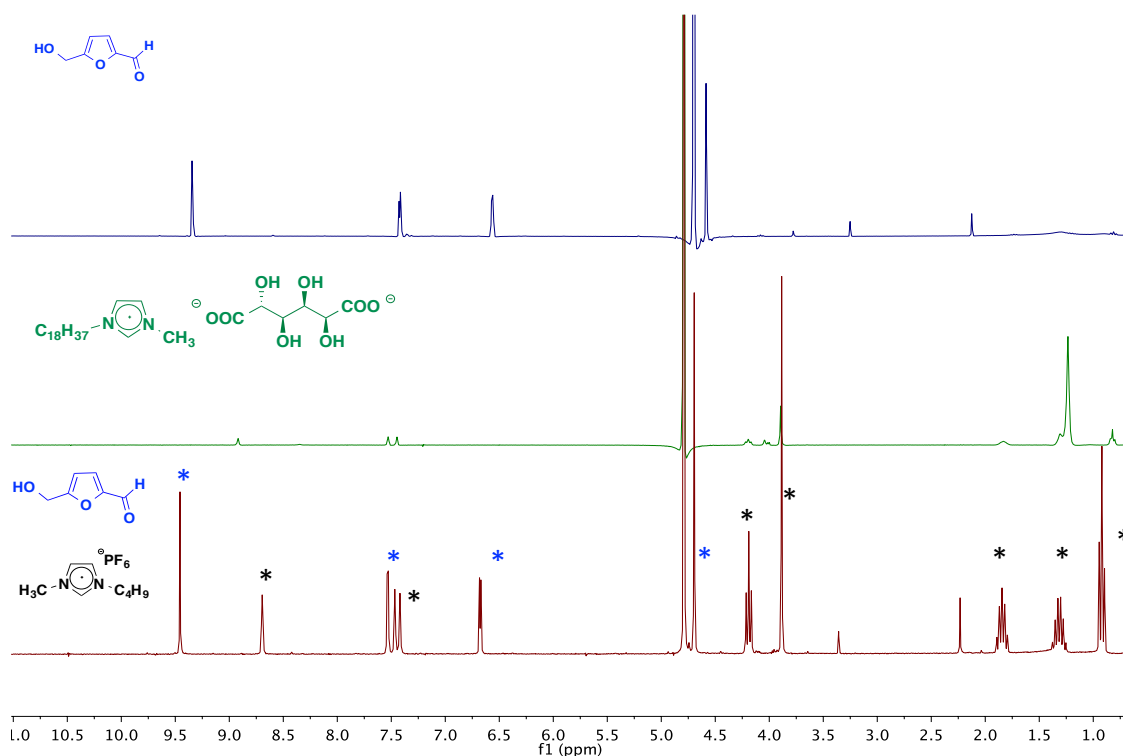

**Figure S8.**  $^1\text{H}$  NMR spectra of: the mixture extracted after the desorption of carbamazepine from **graphite/PF<sub>6</sub>** with 2-Me-THF in CD<sub>3</sub>OD with 5-HMF as internal standard (red), colored asterisks identify protons of the components in the mixture; gelator in D<sub>2</sub>O (green); 5-HMF in D<sub>2</sub>O (blue).

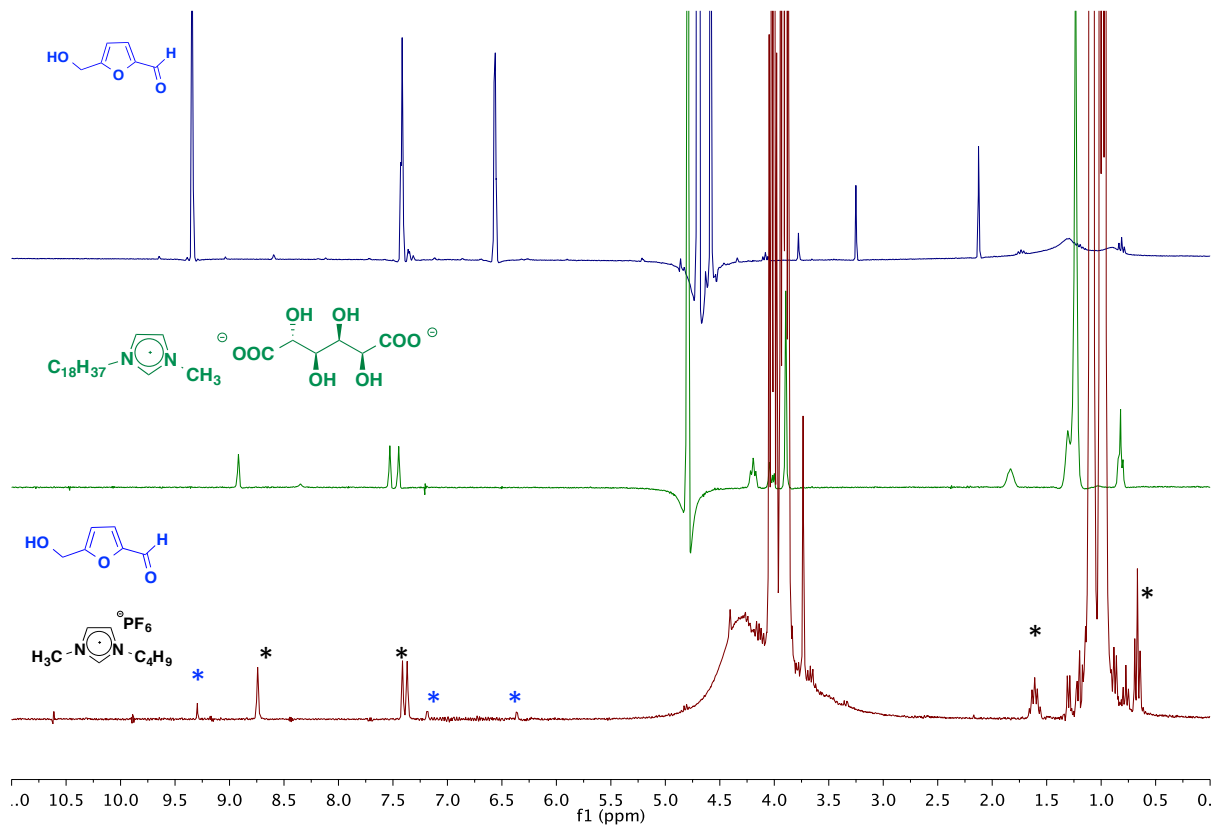

**Figure S9.**  $^1\text{H}$  NMR spectra of: the mixture extracted after the desorption of carbamazepine from **graphite/PF<sub>6</sub>** with ethyl-lactate using DMSO-*d*<sub>6</sub> and 5-HMF as internal standards (red), colored asterisks identify protons of the components in the mixture; gelator in D<sub>2</sub>O (green); 5-HMF in D<sub>2</sub>O (blue).

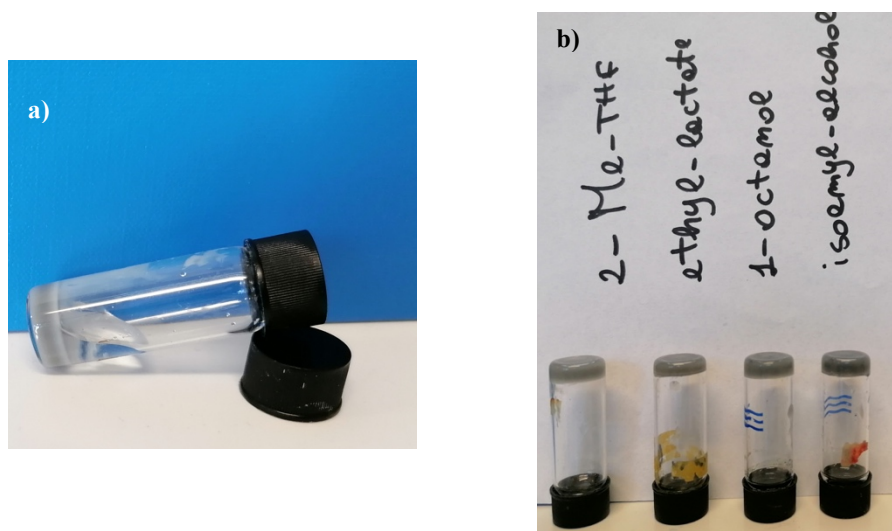

**Figure S10.** Pictures of **a)** solvents (2-Me-THF, ethyl-lactate, 1-octanol, isoamyl alcohol) in contact with hybrid gels after desorption cycles, **b)** stability of hybrid gels after desorption of carbamazepine.

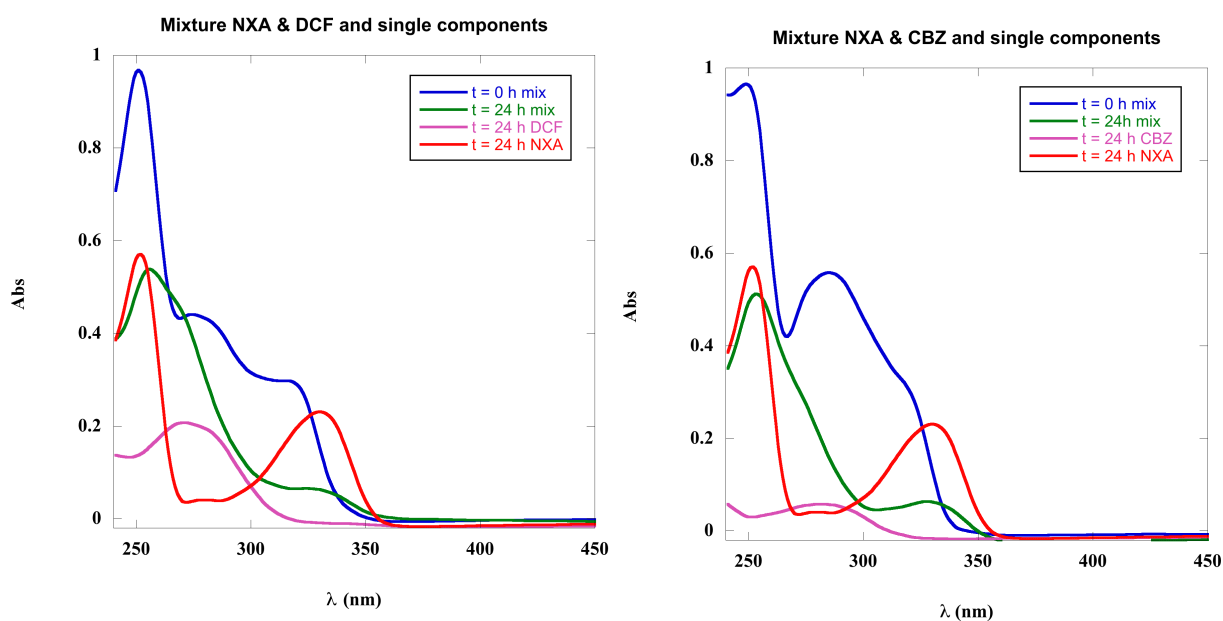

**Figure S11.** UV spectra of PhAC mixtures and single PhACs before and after adsorption on gel.

**Table S1.** RE of **graphite/PF<sub>6</sub>** for the adsorption of [CBZ] =  $1.8 \cdot 10^{-4}$  M after 5 h for several adsorption cycles on the same gel and recycling cycles after desorption of the gel. RE is based on triplicate runs with a reproducibility of 3%.

| Recycling cycle | RE % | RE % after desorption |
|-----------------|------|-----------------------|
| 1               | 83   | 85                    |
| 2               | 74   | 79                    |
| 3               | 74   | 74                    |
| 4               | 59   | 73                    |
| 5               | 52   | 71                    |
| 6               | 62   | 73                    |
| 7               | 57   | 69                    |
| 8               | 59   | 67                    |
| 9               | 40   | 68                    |
| 10              |      | 61                    |
| 11              |      | 57                    |

**Table S2.** Desorption of CBZ from **graphite/PF<sub>6</sub>** after 9 cycles of adsorption in different solvents.

| Solvent of desorption | CBZ extracted (%) | Extraction cycles | Release of [bmim][PF <sub>6</sub> ] (%) |
|-----------------------|-------------------|-------------------|-----------------------------------------|
| 2-Me-THF              | 80                | 7 x 10 min        | 17                                      |
| Ethyl-lactate         | 58*               | 3 x 5 min*        | 20                                      |
| 1-octanol             | 11                | 3 x 30 min        |                                         |
| Isoamyl alcohol       | 25                | 3 x 30 min        |                                         |

\* reduction of gel volume was observed after the third cycle of desorption.

**Table S3.** RE of **graphite/PF<sub>6</sub>** as function of CBZ initial concentration. RE is based on triplicate runs with a reproducibility of 3%.

| Concentration (M)   | RE % at 5 h | RE % at 24 h |
|---------------------|-------------|--------------|
| $6.3 \cdot 10^{-5}$ | 96          | 100          |
| $1.3 \cdot 10^{-4}$ | 89          | 89           |
| $1.8 \cdot 10^{-4}$ | 86          | 90           |
| $3.1 \cdot 10^{-4}$ | 75          | 95           |
| $3.4 \cdot 10^{-4}$ | 78          | 94           |
| $1.0 \cdot 10^{-3}$ | 36          | 86           |

**Table S4.** RE of **graphite/PF<sub>6</sub>** as function of stirring rate at 5h, 25 °C with an initial concentration of CBZ of  $1.8 \cdot 10^{-4}$  M. RE is based on triplicate runs with a reproducibility of 3%.

| Rate of stirring (rpm) | RE (%) |
|------------------------|--------|
| 0                      | 86     |
| 200                    | 85     |
| 400                    | 96     |
| 800                    | 98     |

**Table S5.** RE of **graphite/PF<sub>6</sub>** as function of volume of CBZ ( $1.8 \cdot 10^{-4}$  M) cast on 0.5 mL of gel after 5 h of contact in static (0 rpm) or dynamic (800 rpm) conditions. RE is based on triplicate runs with a reproducibility of 3%.

| Volume (mL) | RE % static condition | RE % dynamic condition |
|-------------|-----------------------|------------------------|
| 0.6         | 83                    | 99                     |
| 1.2         | 37                    | 86                     |
| 2.4         | 19                    | 31                     |
| 3.6         | 1                     | 36                     |

**Table S6.** RE of **graphite/PF<sub>6</sub>** in mixtures of PhACs ( $1.8 \cdot 10^{-4}$  M) after 24 h of contact. RE is based on triplicate runs with a reproducibility of 3%.

| PhAC solution | RE % NXA | RE % CBZ | RE % DCF |
|---------------|----------|----------|----------|
| NXA           | 46       | -        | -        |
| CBZ           | -        | 91       | -        |
| DCF           | -        | -        | 48       |
| NXA, CBZ, DCF | 71       | 58*      | 58*      |
| CBZ, DCF      | -        | 75*      | 75*      |
| NXA, DCF      | 43       | -        | -        |
| NXA, CBZ      | 77       | -        | -        |

\* RE of total basic PhACs, comprising both CBZ and DCF.
